# Supplementary material for: Light manipulating electrode based on high optical haze aluminum-doped zinc oxide for highly efficient indium-tin-oxide free organic solar cells with over 13% efficiency
Source: Royal Society of Chemistry journal article supplement (doi:10.1039/c9tc02189b), 2019-01-01
Supplement: c9tc02189b1.pdf [file c9tc02189b1.pdf]

## Supporting Information

### Light Manipulating Electrode based on High Optical Haze Aluminum-Doped Zinc Oxide for Highly Efficient Indium-Tin-Oxide Free Organic Solar Cells Over 13% Efficiency

Qikun Rong, Jie Zhao, Hui Yu, Na Li\*, Qian Zhang, Dong Yuan\*, Wei Liu, Dongfeng Zheng, Xingsen Gao, Lingling Shui, Guofu Zhou\*, Li Nian\*

**Table R-1.** The differences of the  $J_{sc}$  from EQE and J-V curve for devices based on different cathodes.

| Cathodes    | $J_{sc}$ from EQE<br>(mA/cm <sup>2</sup> ) | $J_{sc}$ from J-V curve<br>(mA/cm <sup>2</sup> ) | Error |
|-------------|--------------------------------------------|--------------------------------------------------|-------|
| Flat-ITO    | 20.93                                      | 20.43                                            | 2.44% |
| Flat-AZO    | 19.86                                      | 19.31                                            | 2.85% |
| Texture-AZO | 22.11                                      | 21.45                                            | 3.08% |

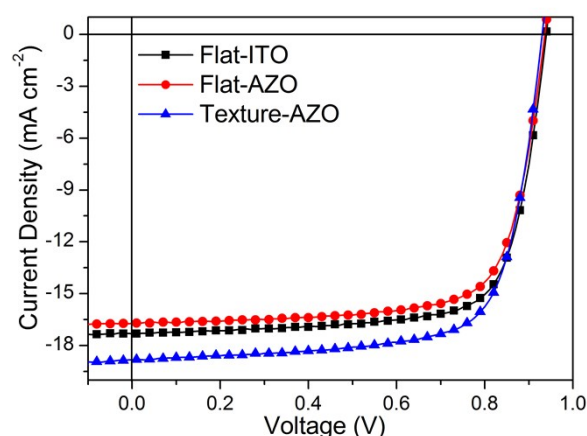

**Figure S-1.** Current density versus voltage characteristics of the devices with different cathodes based on PBDB-T:IT-M active-layer. Device structure: Glass/ Texture-AZO or Flat-AZO or Flat-ITO/ ZnO/ PBDB-T: IT-M/ MoO<sub>3</sub>/Al.

**Table R-2.** Photovoltaic parameters for PBDB-T: IT-M based devices with different cathode.

| Cathodes    | $V_{oc}$ (V) | $J_{sc}$ (mA/cm <sup>2</sup> ) | FF (%) | PCE (%) |
|-------------|--------------|--------------------------------|--------|---------|
| Flat-ITO    | 0.94         | 17.31                          | 73.86  | 12.02   |
| Flat-AZO    | 0.94         | 16.72                          | 72.46  | 11.39   |
| Texture-AZO | 0.94         | 18.84                          | 71.87  | 12.73   |
